# Supplementary material
Source: Elsevier journal article supplement (https://www.sciencedirect.com/science/article/pii/S2174204919301527)
Supplement: mmc1 [file S2174204919301527:mmc1.pdf]

## Knowledge Questionnaire

Translated and adapted by

Teresa McIntyre, Graça Pereira, Vera Soares, José Luís Gouveia, Sofia Silva, 1999

We would like to ask you some questions about heart disease. For questions 1 through 4 please put True (T), False (F), or Do Not Know (NK) in each space (\_\_\_). There can be more than one right answer!

### 1. A heart attack is:

- a) When the heart stops beating: \_\_\_
- b) Caused by a clot in one of the arteries of the heart: \_\_\_
- c) When the heart has an infection: \_\_\_
- d) When the heart is not receiving enough blood: \_\_\_
- e) When you have a collapse after an emotional shock: \_\_\_
- f) When the heart is weak: \_\_\_

### 2. The pain in a heart attack is:

- a) Caused by lack of oxygen in the heart: \_\_\_
- b) The same as in indigestion: \_\_\_
- c) Always means that there is objective damage to the heart: \_\_\_

### 3. The likelihood of having another heart attack is lower:

- a) After the first days in the hospital: \_\_\_
- b) If the person changes his lifestyle: \_\_\_
- c) If the person returns to his normal level of activity right after leaving the hospital: \_\_\_

### 4. After a heart attack:

- a) Most people never get back to their previous level of activity: \_\_\_
- b) Most people are able to return to part-time work, or lighter full time work, in 8 to 12 weeks after leaving the hospital: \_\_\_
- c) After a heart attack sex life has to change forever: \_\_\_
- d) Because they rest in hospital, the majority of people are full of energy when they come home: \_\_\_
- e) Do not drink alcohol: \_\_\_
- f) You can drive during the first week after leaving the hospital: \_\_\_
- g) It is important to avoid laughing too hard: \_\_\_
